# Supplementary material
Source: publisher figshare collection journal article supplement (https://tandf.figshare.com/ndownloader/files/12548375)
Supplement: Supplementary file 1 [file 12548375]

**Appendices**

**Appendix 1.** List of sampling sites and GPS coordinates in the Sunnyside (Humber River) and Rouge beachsheds, including sampling events for total and soluble reactive phosphorus.





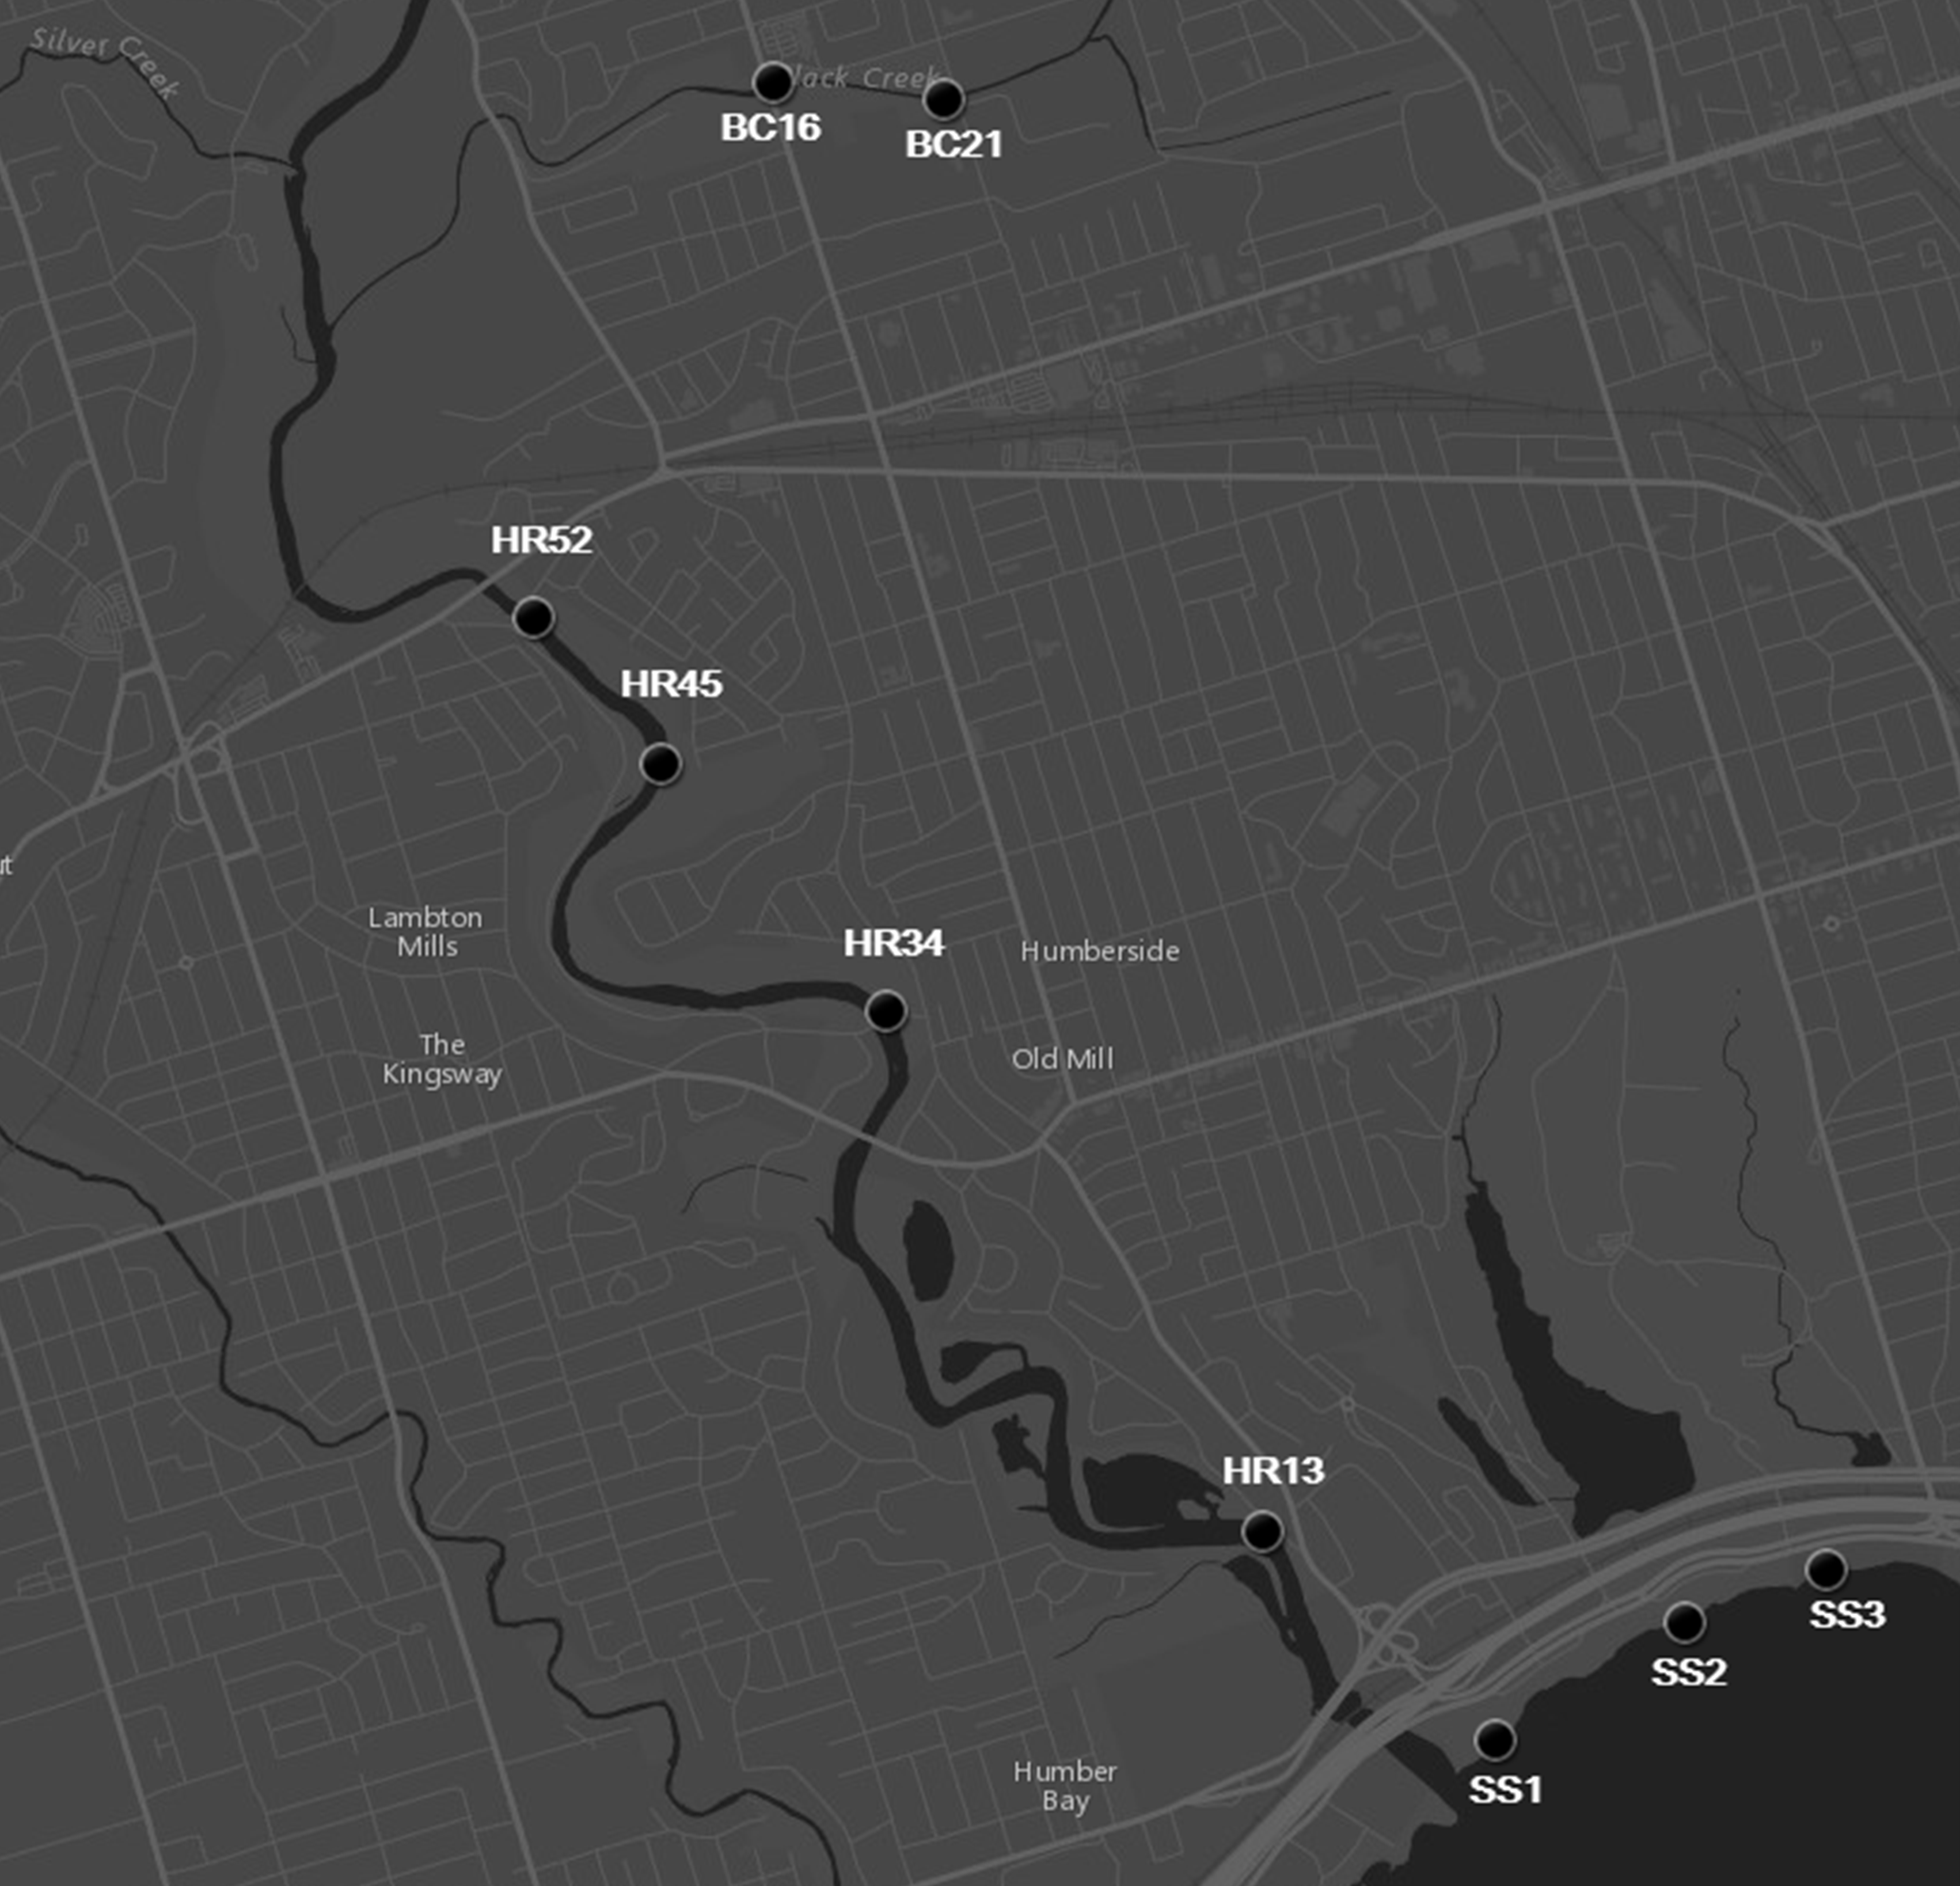


**Appendix 2.** Map of sampling sites for the Humber River and Sunnyside Beach.


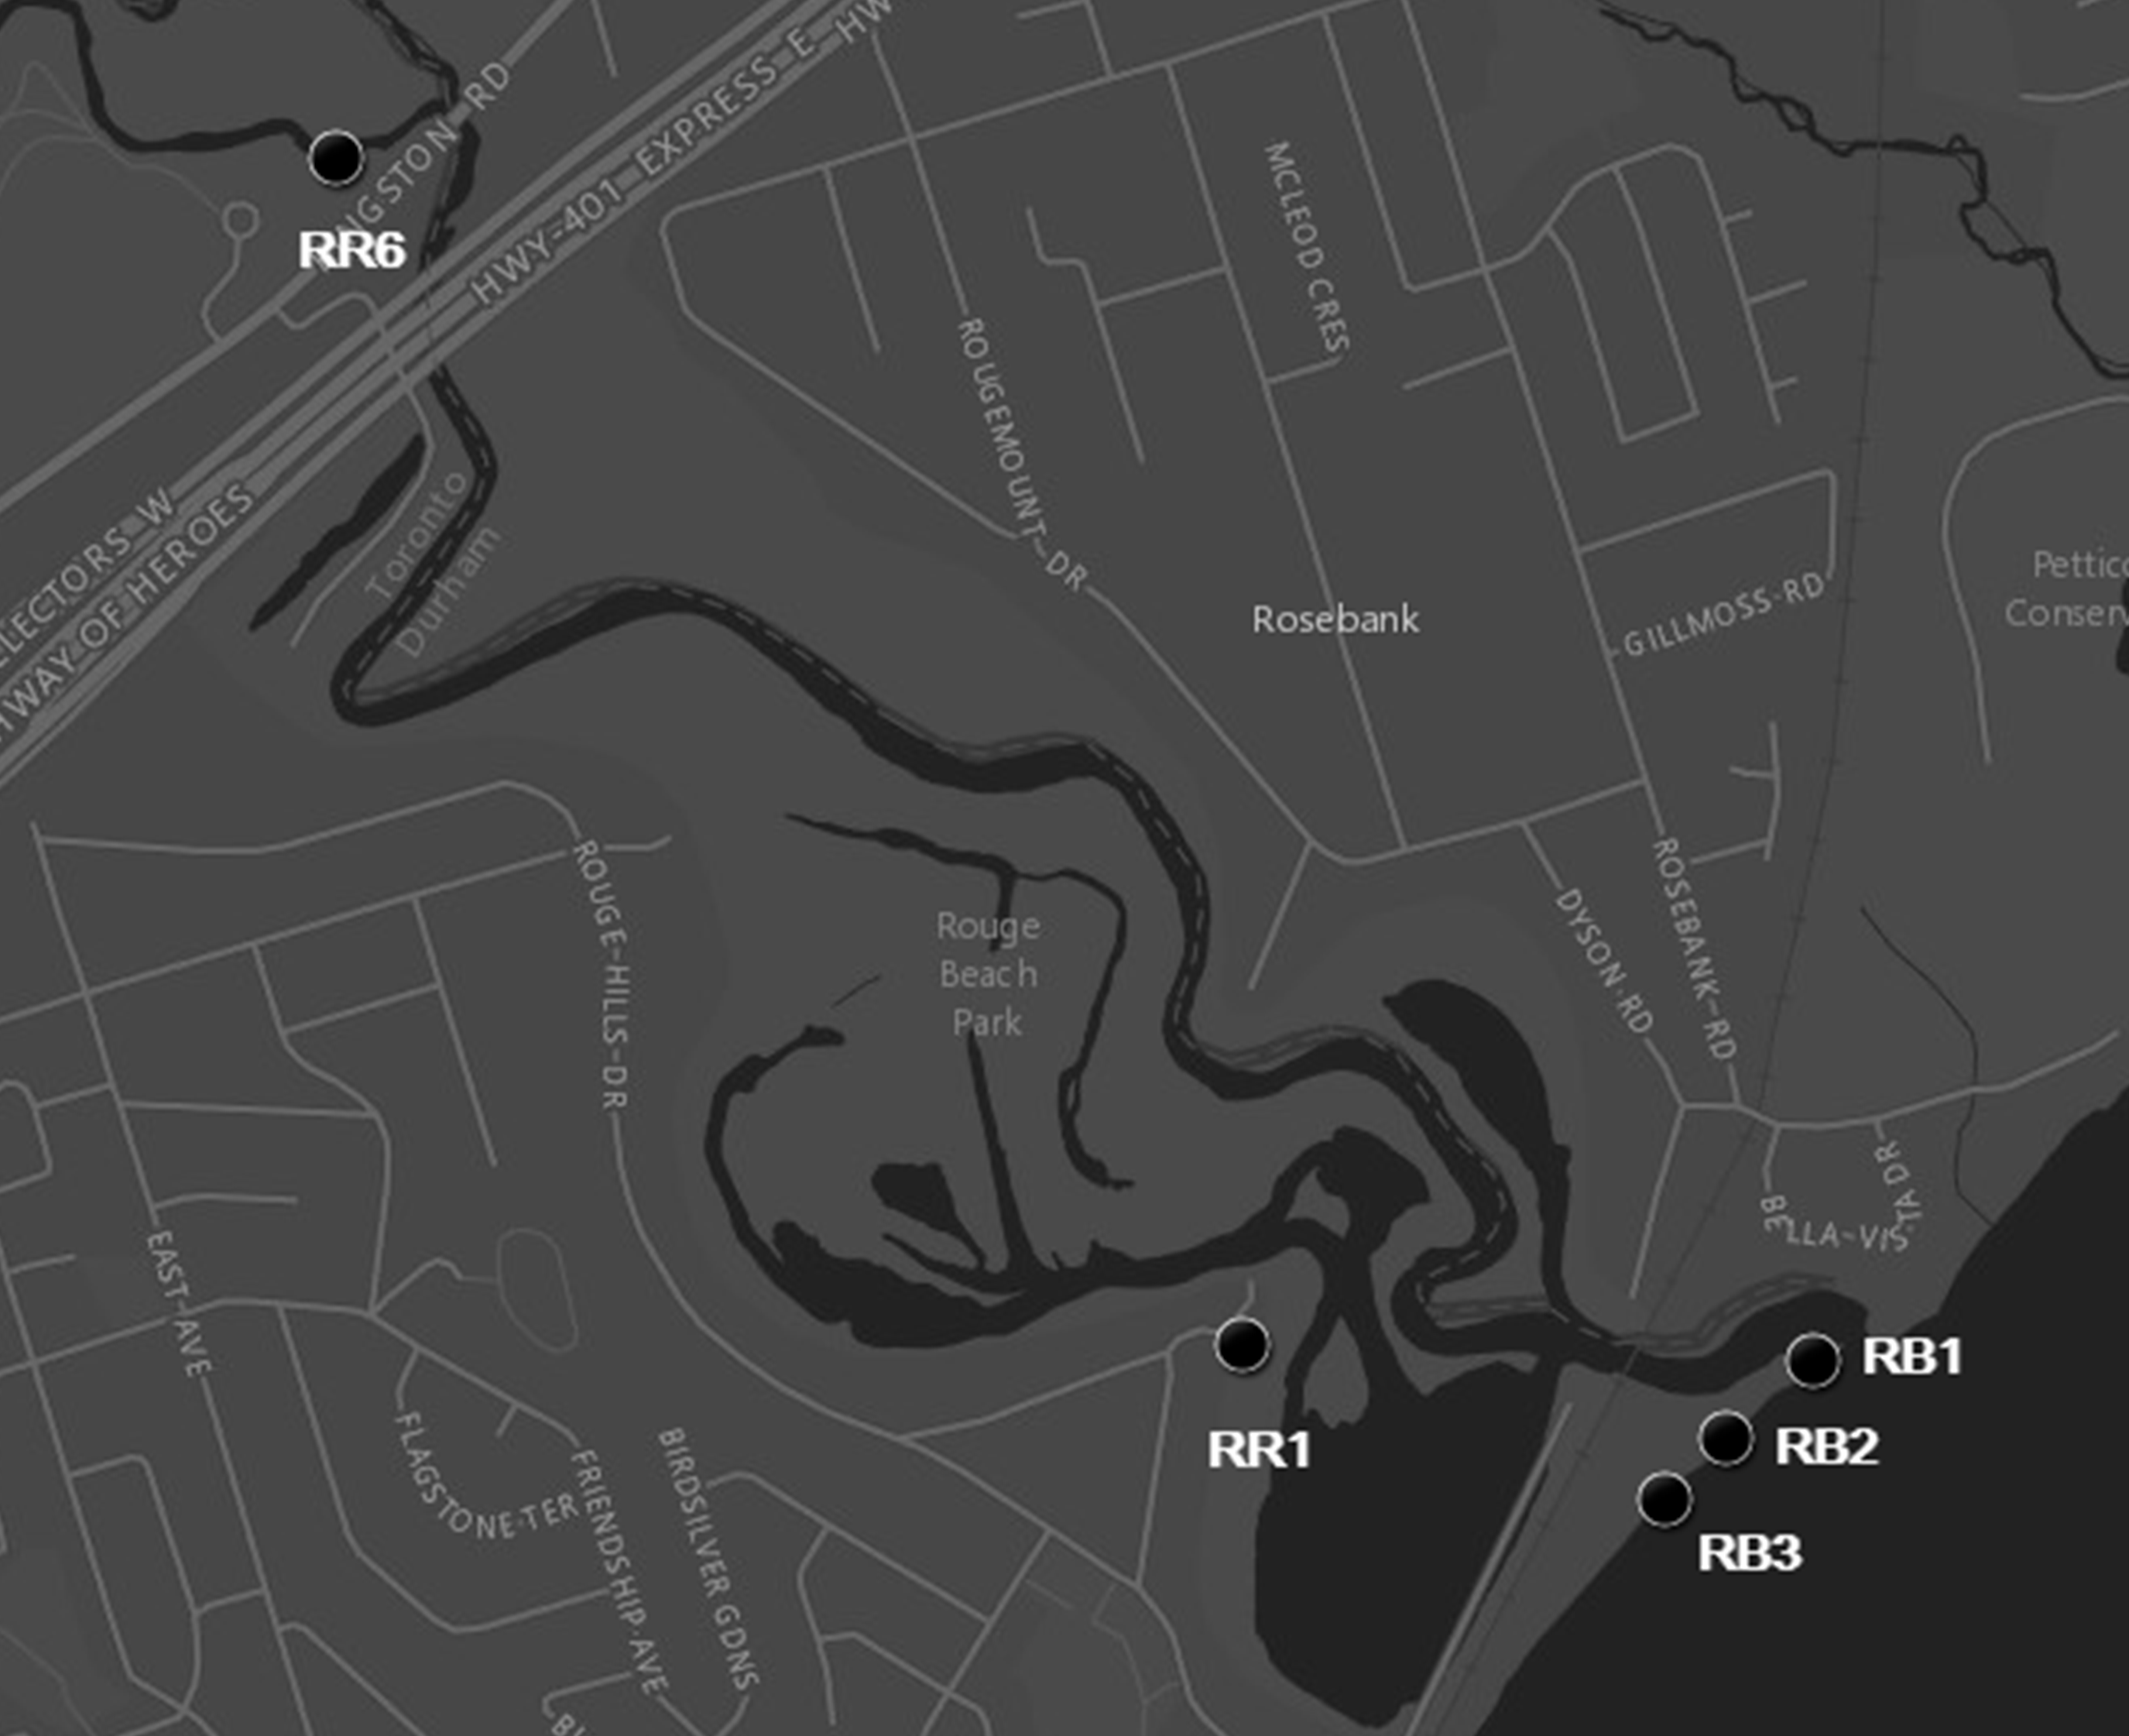


**Appendix 3**. Map of sampling sites for Rouge River and Rouge Beach. The UR outfall is a considerable distance upstream and not pictured.
